# Supplementary material
Source: publisher site journal article supplement (https://www.dovepress.com/article/329829)
Supplement: Supplementary file 1 [file get_supplementary_file.php]

**Supplementary Material**

Supplementary Table 1. A comparison of themes and concepts from the text mining analysis across countries.

| United States (N=202 papers) | | | Australia (N=54 papers) | | | United Kingdom (N= 52 papers) | | | Other 65 countries (N= 275 papers) | | |
| --- | --- | --- | --- | --- | --- | --- | --- | --- | --- | --- | --- |
| Theme* | Connection  to the CR  literature  (hits) | Automated  concepts within  theme | Theme* | Connection  to the CR  literature  (hits) | Automated  concepts within  theme | Theme* | Connection  to the CR  literature  (hits) | Automated  concepts within  theme | Theme* | Connection  to the CR  literature  (hits) | Automated  concepts within  theme |
| Community | 893 | Community  Model  Results  Process  Vulnerability  different | Community | 254 | Community  Resilience  Development  Approach  Framework  Events  Support  Systems  level | Community | 253 | Community  Resilience  Local  Empowerment  Change  Different  Interviews  Findings  Implications | Resilience | 1383 | Resilience  Level  Recovery  Data  Factors  Knowledge  Context  Response  Individual |
| Resilience | 889 | Resilience  Natural  Framework  Systems  Planning  Challenges  Key | Disaster | 117 | Disaster  Management  Natural  Response  Risk  Emergency  Reduction | Social | 111 | Social  Framework  Capital  Building  Approach  Data  Support  cultural | Community | 1381 | Community  Change  Climate  Urban  Environment  Vulnerability  Changes  Population |
| Disaster | 389 | Disaster  Recovery  Response  Infrastructure  Risk  Events  Management | Change | 90 | Change  Local  Climate  Need  Capacity  Impacts  Important | Flood | 72 | Flood  Risk  UK  Policy  Knowledge  Management  Coastal | Social | 706 | Social  Local  Capital  Development  Process  Building  Approach  Economic  Resources  System |
| Change | 318 | Change  Development  Local  Climate  Approach  Public  Important | Social | 81 | Social  Public  Policy  Strategies  Health  Government  Responsibility | Processes | 57 | Processes  Challenges  Case  Level  Organic | Disaster | 518 | Disaster  Management  Risk  Natural  Framework  Capacity  Areas  Activities |
| Social | 297 | Social  Health  Hazards  Capacity  Resources  Support | Recovery | 29 | Recovery  Related | Rural | 44 | Rural  Role  Activities | Model | 146 | Model  Species  Flood |
| Factors | 225 | factors  Data  Individuals  Effects  Areas  Counties | Scales | 13 | Scales  Microbial |  |  |  | Health | 52 | Health |

* Themes are automated from the Leximancer software according to text mining based on country-specific CR literature.
